# Supplementary material for: AKT supports the metabolic fitness of multiple myeloma cells by restricting FOXO activity
Source: PubMed Central journal article supplement — Blood Adv. 2022 Nov 4;7(9):1697–712. doi: 10.1182/bloodadvances.2022007383 (PMC10182179; doi:10.1182/bloodadvances.2022007383), 2022-11-04
Supplement: BLOODA_ADV-2022-007383-mmc1.pdf [file BLOODA_ADV-2022-007383-mmc1.pdf]

## **SUPPLEMENTARY MATERIALS AND METHODS**

### **Cell culture and reagents**

The human multiple myeloma (MM) cell lines LME-1, MM1.S, XG-1, XG-3, LP-1, ANBL-6, UM-3, RPMI-8226, and B-cell malignancy cell lines (BCMCLs) JEKO-1, REC, GRANTA-519 (mantle cell lymphoma; MCL), RAJI, RAMOS (Burkitt lymphoma; BL), KMH2, L428, L540 (Hodgkin lymphoma; HL), RIVA, U2932 and HBL-1 (diffuse large B-cell lymphoma; DLBCL) were cultured at 37°C, 5% CO<sub>2</sub> in Iscove's modified Dulbecco medium (IMDM; Invitrogen Life Technologies, Carlsbad, CA) supplemented with 2 mM of L-glutamine (Gln), 100 U/mL of penicillin, 100 µg/mL of streptomycin (P/S; Gibco, Thermo Fisher Scientific, Waltham, MA), and 10% fetal calf serum (FCS; HyClone, GE Healthcare Life Sciences, Pittsburgh, PA) unless stated otherwise. XG-1, XG-3, and ANBL-6 were cultured in the presence of 1 ng/mL interleukin-6 (IL-6; Prospec Inc., Rehovot, Israel), which was removed before using these cell lines in experiments. In galactose-adaptation experiments, cells were cultured for 4 days at 37°C, 5% CO<sub>2</sub> in supplemented (Gln, P/S, 10% FCS) RPMI-1640 or in supplemented (Gln, P/S, 10% FCS) glucose-free RPMI-1640 with 11.1 mM galactose (Sigma Aldrich), prior to metabolic and viability analyses. The generation of CRISPR/Cas9 Knock out (KO) HMCL clones and MCL-1-overexpressing HCML has been described previously<sup>1</sup>. The following (small-molecule) inhibitors were used: MK2206 (AKT inhibitor; MedChemExpress, Monmouth Junction, NJ), GSK2110813 (AKT inhibitor; Selleck Chemicals, Houston, TX), sodium dichloroacetate (DCA; MedChemExpress). 2-deoxy-D-glucose (2-DG; Sigma Aldrich, St. Louis, MO).

### **Isolation of primary MM plasma cells, human peripheral blood mononuclear cells (PBMNCs), and purification of human peripheral blood B cells**

Primary MM plasma cells were obtained from the bone marrow samples of two newly diagnosed patients with plasmacytosis of >80% (percent CD138<sup>+</sup> CD38<sup>+</sup> cells of mononuclear cells). Plasma cells were enriched by Ficoll-Paque (Cytiva Life Sciences, Marlborough, MA)

density centrifugation and overnight culture in supplemented IMDM (Gln, P/S, 10% FCS) with 1 ng/mL interleukin-6. Purity of primary MM plasma cells was assessed by flow-cytometry staining for CD138 and CD38 and was confirmed >95% prior to further experiments. PMBNCs from were isolated by Ficoll-Paque density centrifugation of buffy coats (obtained from 500 ml whole blood, Sanquin, Amsterdam, The Netherlands) from three healthy donors. To remove remaining red blood cells, cell pellets were resuspended in 10 ml 1x lysis buffer (Red Blood Cell Lysis Buffer, BioVision, San Fransisco, CA) and incubated for 10 min, in the dark at room temperature. B cells were purified using MACs cell separation (Pan B cell isolation Kit, Miltenyi Biotec, Bergisch Gladbach, Germany) according to manufacturer's protocol. B-cell purity was > 95% for all donors as confirmed by flowcytometry staining for CD19 (clone SJ25C1, BD Biosciences, Franklin Lakes, NJ). The isolated PMBNCs and purified B cells were cultured in at a density of  $1 \times 10^6$ /mL in 6 well-plates in supplemented MDM (Gln, P/S, 10% FCS) at 37°C, 5% CO<sub>2</sub> and activated with CpG oligodeoxynucleotides (5 µg/mL, CpG ODN 2006, Invivogen, Toulouse, France) for 48 hours prior to Seahorse XF metabolic profiling assays.

### **Metabolic profiling**

The XF Cell Mito Stress Test and XF Glycolysis stress test were used to determine mitochondrial function (oxygen consumption rate; OCR) and glycolytic rate (extracellular acidification rate; ECAR), respectively, according to the manufacturer's protocol. For both protocols, XF Cell culture plates (Agilent, Santa Clara, CA) were precoated with Poly-D- lysine (50 µg/ml, Sigma Aldrich). For cell lines and for primary MM samples 50,000 cells were used per measurement, and for PBMNCs/purified B cells 100,000 cells were used. 5 to 6 replicate measurements were performed per sample/per analysis. For Seahorse analyses, cells were spun down in 50 µl of appropriately supplemented (according to the specific metabolic profiling assay) base medium (Dulbecco's modified eagle medium (DMEM); 31.6 mM NaCl, 45 µM phenol red, pH 7.4) in the precoated plates after which the volume was adjusted to 175 µl using supplemented base medium. The plates were then incubated for 1 hour at 37°C in a non-CO<sub>2</sub>

incubator, after which OCR and ECAR were measured on a seahorse 96XFe analyser (Agilent). In the XF Glycolysis stress test basal medium was supplemented with 2 mM glutamine and the following compounds were injected during the assay at the final concentrations of 10mM glucose (A), 1.5  $\mu$ M oligomycin (B) and 100mM 2-DG (C). Glycolysis was calculated by subtracting the non-glycolytic acidification (last ECAR value before injection A) from the highest ECAR value after injection A. The glycolytic reserve was calculated by subtracting the glycolysis from the glycolytic capacity (highest ECAR value after injection B – the non-glycolytic acidification). Glycolytic reserve as a % was calculated by dividing the glycolytic capacity by the glycolysis x 100.

For the XF Cell Mito Stress test, the base medium was supplemented with 25 mM D-glucose, 1mM sodium pyruvate and 2mM glutamine (unless stated otherwise in the figure legends), during the assay, the following compounds were injected to final concentrations of 1.5  $\mu$ M oligomycin (A), 2  $\mu$ M FCCP (B) and 1.25  $\mu$ M Rotenone + 2.5  $\mu$ M Antimycin A (C). Basal respiration was calculated by subtracting the non-mitochondrial respiration rate (lowest OCR value after injection C) from the last OCR value before injection A. The spare respiratory capacity was calculated by subtracting the basal respiration from the maximal respiration (highest OCR value after injection B – the non-mitochondrial respiration rate). The spare respiratory capacity as a % was calculated by dividing the maximum respiration by the basal respiration value x 100.

### **Antibodies**

Antibodies used in this study are: rabbit-anti-HK2 (Biorbyt, Cambridge, UK), rabbit-anti-PKM2 (clone D78A4), rabbit-anti-Phospho-FoxO1 (Thr24)/FoxO3a (Thr32), rabbit-anti-FoxO1 (clone C29H4), FoxO3a (clone 75D8), rabbit-anti-Phospho-Akt (Ser473) (clone D9E) XP, rabbit-anti-Akt1/2/3 (clone C67E7) (Cell signaling technologies, Beverly, MA), mouse-anti-PDH1 (clone 9H9AF5, Abcam, Cambridge, UK), rabbit-anti-Phospho-PDH-E1 $\alpha$  (Ser293) (Sigma-Aldrich), mouse-anti  $\beta$ -actin (clone C4, Millipore, Burlington, USA).

### **2-NBDG assay**

For the fluorescent glucose analog 2-NBDG flow cytometry assay, 100,000 cells were incubated in supplemented RPMI-1640 without glucose for 20 minutes at 37°C, 5% CO<sub>2</sub>. 2-NBDG was added at a final concentration of 25 µM and incubated for 30 minutes at 37°C, 5% CO<sub>2</sub>, or on ice as a negative control, after which the samples were analyzed by flow cytometry.

## REFERENCES

1. Bloedjes TA, de Wilde G, Maas C, et al. AKT signaling restrains tumor suppressive functions of FOXO transcription factors and GSK3 kinase in multiple myeloma. *Blood Adv.* 2020;4(17):4151–4164.

**SUPPLEMENTARY TABLE S1. Leading edge genes from several metabolic GSEAs.**

The leading-edge genes that contribute to core enrichment in the GSEAs for glycolysis - (HALLMARK\_GLYCOLYSIS, KEGG\_GLYCOLYSIS, REACTOME\_GLYCOLYSIS or TCA cycle - (BIOCARTA\_KREB\_PATHWAY, GO\_CITRATE\_METABOLIC\_PROCESS, MOTHATCA, KEGG\_CITRATE\_CYCLE, TCA\_CYCLE) or OXPHOS gene sets (KEGG\_OXIDATIVE\_PHOSPHORYLATION, HALLMARK\_OXIDATIVE\_PHOSPHORYLATION) (Fig 3B and Suppl. Fig. 3A-C) were combined in the LE\_GLYCOLYSIS, LE\_TCA\_CYCLE or LE\_OXPHOS gene sets.

| REACTOME_GLYCOLYSIS | KEGG_GLYCOLYSIS | HALLMARK_GLYCOLYSIS | LE_GLYCOLYSIS |
|---------------------|-----------------|---------------------|---------------|
| AAAS                | ADH1C           | ABC86               | AAAS          |
| ENO2                | AKR1A1          | AKR1A1              | ABC86         |
| GAPDH5              | ALDH1B1         | ALG1                | ADH1C         |
| HK3                 | ALDH3A2         | ANGPTL4             | AKR1A1        |
| ND1                 | ALDOA           | ARPP19              | ALDH1B1       |
| NUP107              | BPGM            | ARTN                | ALDH3A2       |
| NUP153              | DLAT            | AURKA               | ALDOA         |
| NUP160              | DLG             | B4GALT2             | ALG1          |
| NUP188              | ENO2            | CDK1                | ANGPTL4       |
| NUP205              | ENO3            | CENPA               | ARPP19        |
| NUP210              | FBP1            | CHST6               | ARTN          |
| NUP214              | G6PC2           | CLNB                | AURKA         |
| NUP35               | HK1             | COG2                | B4GALT2       |
| NUP37               | HK3             | CY8A                | BPGM          |
| NUP52               | LDHA            | DEPDC1              | ARPP19        |
| NUP93               | LDHC            | DLG                 | CENPA         |
| NUP98               | PDHA1           | DS2C                | CHST6         |
| PFKFB1              | PDHA2           | ENO2                | CLNB          |
| PFKL                | PDHB            | FKBP4               | COG2          |
| PKM                 | PFKL            | G6PD                | CY8A          |
| PGP                 | PFKM            | GAPDH5              | DEPDC1        |
| PPP2R1B             | PGAM1           | GOT1                | DLAT          |
| PPP2R5D             | PGK1            | GOT2                | DLG           |
| PRKACA              | PGM1            | GPI1                | SDC2          |
| SEH1L               | PGM2            | HOMER1              | ENO2          |
| TP11                | PKM             | HS2T1               | ENO3          |
| TP11                | KIF20A          | FBP1                |               |
|                     |                 | LDHC                | FKBP4         |
|                     |                 | MDH1                | G6PC2         |
|                     |                 | MED24               | G6PD          |
|                     |                 | MF                  | GAPDH5        |
|                     |                 | MOX                 | GOT1          |
|                     |                 | NASP                | GOT2          |
|                     |                 | NASP                | GPI1          |
|                     |                 | PAXIP1              | HK1           |
|                     |                 | PC                  | HK3           |
|                     |                 | PFKFB1              | HOMER1        |
|                     |                 | POLR3K              | HS2T1         |
|                     |                 | PRKACA              | KIF20A        |
|                     |                 | PRPS1               | LDHA          |
|                     |                 | PSMC4               | LDHC          |
|                     |                 | RPE                 | MDH1          |
|                     |                 | SAP30               | PFKL          |
|                     |                 | SDC1                | MIF           |
|                     |                 | SDC2                | MOX           |
|                     |                 | SDC3                | NASP          |
|                     |                 | SLC25A10            | ND1           |
|                     |                 | SLC37A4             | ND3HL         |
|                     |                 | SRD5A3              | NUP107        |
|                     |                 | STC1                | NUP153        |
|                     |                 | STMN1               | NUP160        |
|                     |                 | TALDO1              | NUP188        |
|                     |                 | TF3                 | NUP205        |
|                     |                 | TP11                | NUP210        |
|                     |                 | TPST1               | NUP214        |
|                     |                 | TXN                 | NUP35         |
|                     |                 | VLDLR               | NUP37         |
|                     |                 |                     | NUP52         |
|                     |                 |                     | NUP93         |
|                     |                 |                     | NUP98         |
|                     |                 |                     | PAXIP1        |
|                     |                 |                     | PC            |
|                     |                 |                     | PDHA1         |
|                     |                 |                     | PDHA2         |
|                     |                 |                     | PDHB          |
|                     |                 |                     | PFKFB1        |
|                     |                 |                     | PFKL          |
|                     |                 |                     | PFKM          |
|                     |                 |                     | PGAM1         |
|                     |                 |                     | PGK1          |
|                     |                 |                     | PGM1          |
|                     |                 |                     | PGM2          |
|                     |                 |                     | PGP           |
|                     |                 |                     | PKM           |
|                     |                 |                     | POLR3K        |
|                     |                 |                     | PPP1A4        |
|                     |                 |                     | PPP2R1B       |
|                     |                 |                     | PPP2R5D       |
|                     |                 |                     | PRKACA        |
|                     |                 |                     | PRPS1         |
|                     |                 |                     | PSMC4         |
|                     |                 |                     | RPE           |
|                     |                 |                     | SAP30         |
|                     |                 |                     | SDC1          |
|                     |                 |                     | SDC2          |
|                     |                 |                     | SDC3          |
|                     |                 |                     | SEH1L         |
|                     |                 |                     | SLC25A10      |
|                     |                 |                     | SLC37A4       |
|                     |                 |                     | SRD5A3        |
|                     |                 |                     | STC1          |
|                     |                 |                     | STMN1         |
|                     |                 |                     | TALDO1        |
|                     |                 |                     | TF3           |
|                     |                 |                     | TP11          |
|                     |                 |                     | TPST1         |
|                     |                 |                     | TXN           |
|                     |                 |                     | VLDLR         |

| BIOCARTA_KREB_PATHWAY | GO_CITRATE_METABOLIC_PROCESS | MOOTHATCA | KEGG_CITRATE_CYCLE | LE_TCA_CYCLE |
|-----------------------|------------------------------|-----------|--------------------|--------------|
| ACO2                  | ACLY                         | ACO2      | ACLY               | ACLY         |
| CS                    | ACO1                         | CS        | ACO1               | ACO1         |
| FH                    | ACO2                         | FH        | ACO2               | ACO2         |
| MDH1                  | CS                           | IDH3A     | CS                 | CS           |
| SUCLA2                | IREB2                        | IDH3B     | DLAT               | DLAT         |
|                       |                              | IDH3G     | DLG                | DLG          |
|                       |                              | MDH2      | FH                 | FH           |
|                       |                              | SDHB      | IDH3A              | IDH3A        |
|                       |                              | SDHC      | IDH3B              | IDH3B        |
|                       |                              | SDHD      | MDH1               | IDH3G        |
|                       |                              | SUCLA2    | MDH2               | IREB2        |
|                       |                              | SUCLG1    | PC                 | MDH1         |
|                       |                              |           | PDHA1              | MDH2         |
|                       |                              |           | PDHA2              | PC           |
|                       |                              |           | PDHB               | PDHA1        |
|                       |                              |           | SDHB               | PDHA2        |
|                       |                              |           | SDHD               | PDHB         |
|                       |                              |           | SUCLA2             | SDHB         |
|                       |                              |           | SUCLG1             | SDHC         |
|                       |                              |           | SUCLG2             | SDHD         |
|                       |                              |           |                    | SUCLA2       |
|                       |                              |           |                    | SUCLG1       |
|                       |                              |           |                    | SUCLG2       |

| KEGG_OXIDATIVE_PHOSPHORYLATION | HALLMARK_OXIDATIVE_PHOSPHORYLATION | LE_OXPHOS |
|--------------------------------|------------------------------------|-----------|
| ATP5F1B                        | ABC7                               | ABC7      |
| ATP5F1C                        | ACAA2                              | ACAA2     |
| ATP5F1E                        | ACADM                              | ACADM     |
| ATP5MC1                        | ACAT1                              | ACAT1     |
| ATP5MC3                        | AFG3L2                             | AFG3L2    |
| ATP5ME                         | AIFM1                              | AIFM1     |
| ATP5MF                         | ALAS1                              | ALAS1     |
| ATP5PD                         | ALDH6A1                            | ALDH6A1   |
| ATP5PF                         | ATP5F1B                            | ATP5F1B   |
| ATP5P0                         | ATP5F1C                            | ATP5F1C   |
| ATP5V0A2                       | ATP5F1E                            | ATP5F1E   |
| ATP5V1A                        | ATP5MC1                            | ATP5MC1   |
| ATP5V1B2                       | ATP5MC3                            | ATP5MC3   |
| ATP5V1C1                       | ATP5ME                             | ATP5ME    |
| ATP5V1D                        | ATP5MF                             | ATP5MF    |
| ATP5V1E1                       | ATP5PD                             | ATP5PD    |
| ATP5V1H                        | ATP5PF                             | ATP5PF    |
| COX11                          | ATP5P0                             | ATP5P0    |
| COX15                          | ATP5V1C1                           | ATP5V0A2  |
| COX17                          | ATP5V1D                            | ATP5V1A   |
| COX5A                          | ATP5V1E1                           | ATP5V1B2  |
| COX5B                          | ATP5V1H                            | ATP5V1C1  |
| COX6A1                         | BCKDHA                             | ATP5V1D   |
| COX6C                          | BCKDHB                             | ATP5V1E1  |
| COX7A2                         | COX11                              | ATP5V1H   |
| COX7B                          | COX15                              | BCKDHA    |
| COX7C                          | COX17                              | BDH2      |
| COX8A                          | COX5A                              | COX11     |
| CYC1                           | COX5B                              | COX15     |
| NDUFA1                         | COX6A1                             | COX17     |
| NDUFA10                        | COX8A                              | COX5A     |
| NDUFA2                         | COX7A2                             | COX5B     |
| NDUFA4                         | COX7B                              | COX5A     |
| NDUFA5                         | COX7C                              | COX6C     |
| NDUFA6                         | CS                                 | COX7A2    |
| NDUFA8                         | CY8A                               | COX7B     |
| NDUFA9                         | CY8B                               | COX7C     |
| NDUFAB1                        | CYCS                               | COX8A     |
| NDUFB1                         | DECR1                              | CS        |
| NDUFB10                        | DLAT                               | CY8A      |
| NDUFB2                         | DLG                                | CYC1      |
| NDUFB3                         | ECHS1                              | CYCS      |
| NDUFB4                         | EC1                                | DECR1     |
| NDUFB6                         | ETFA                               | DLAT      |
| NDUFB8                         | ETFB                               | DLG       |
| NDUFB9                         | FH                                 | ECHS1     |
| NDUFC2                         | GLUD1                              | ETFA      |
| NDUFS1                         | GOT2                               | ETFB      |
| NDUFS2                         | GPI                                | FH        |
| NDUFS5                         | HADHB                              | GLUD1     |
| NDUFS6                         | HCCS                               | GOT2      |
| NDUFS7                         | HSO17B10                           | GPI       |
| NDUFV1                         | HSPA9                              | HADHB     |
| NDUFV2                         | HTRA2                              | HCCS      |
| PPA1                           | IDH1                               | HSO17B10  |
| PPA2                           | IDH3A                              | LDHB      |
| SDHA                           | IDH3B                              | LRPPRC    |
| SDHC                           | IDH3G                              | MDH1      |
| SDHD                           | IMMT                               | MDH2      |
| UQCRL10                        | ISCA1                              | LDHA      |
| UQCRL11                        | LDHA                               | LDHB      |
| UQCRC1                         | LDHB                               | LRPPRC    |
| UQCRC2                         | LRPPRC                             | MDH1      |
| UQCRCF1                        | MDH1                               | MDH2      |
|                                | MDH2                               | MRP15     |
|                                | MRP15                              | MRPL15    |
|                                | MRPL15                             | MRPL35    |
|                                | MRPL35                             | MRPS11    |
|                                | MTRR                               | MRPS12    |
|                                | MTX2                               | MRPS15    |
|                                | NDUFA1                             | MRPS30    |
|                                | NDUFA2                             | MRPS30    |
|                                | NDUFA4                             | MTRR      |
|                                | NDUFA5                             | MTX2      |
|                                | NDUFA6                             | NDUFA1    |
|                                | NDUFA8                             | NDUFA10   |
|                                | NDUFA9                             | NDUFA2    |
|                                | NDUFAB1                            | NDUFA4    |
|                                | NDUFB1                             | NDUFA5    |
|                                | NDUFB2                             | NDUFA6    |
|                                | NDUFB3                             | NDUFA8    |
|                                | NDUFA9                             | NDUFA9    |
|                                | NDUFB6                             | NDUFAB1   |
|                                | NDUFB8                             | NDUFB1    |
|                                | NDUFC2                             | NDUFB10   |
|                                | NDUFS1                             | NDUFB2    |
|                                | NDUFS2                             | NDUFB3    |
|                                | NDUFS6                             | NDUFB4    |
|                                | NDUFS7                             | NDUFB6    |
|                                | NDUFV1                             | NDUFB8    |
|                                | NDUFV2                             | NDUFB9    |
|                                | NNT                                | NDUFC2    |
|                                | OAT                                | NDUFS1    |
|                                | OGDH                               | NDUFS2    |
|                                | OPA1                               | NDUFS5    |
|                                | PDHA1                              | NDUFS6    |
|                                | PDHB                               | NDUFS7    |
|                                | PDHX                               | NDUFV1    |
|                                | PDP1                               | NDUFV2    |
|                                | POLR2F                             | NNT       |
|                                | PRDX3                              | OAT       |
|                                | RHOT1                              | OGDH      |
|                                | SDHA                               | OPA1      |
|                                | SDHC                               | PDHA1     |
|                                | SDHD                               | PDHB      |
|                                | SLC25A11                           | PDHX      |
|                                | SLC25A12                           | PDP1      |
|                                | SLC25A20                           | POLR2F    |
|                                | SLC25A4                            | PPA1      |
|                                | SLC25A5                            | PPA2      |
|                                | SUCLA2                             | PRDX3     |
|                                | SUCLG1                             | RHOT1     |
|                                | TIMM10                             | SDHA      |
|                                | TIMM13                             | SDHC      |
|                                | TIMM17A                            | SDHD      |
|                                | TIMM45                             | SLC25A11  |
|                                | TIMM8B                             | SLC25A12  |
|                                | TOMM70                             | SLC25A20  |
|                                | UQCRL10                            | SLC25A4   |
|                                | UQCRL11                            | SLC25A5   |
|                                | UQCRC1                             | SUCLA2    |
|                                | UQCRC2                             | SUCLG1    |
|                                | UQCRCF1                            | TIMM10    |
|                                | VDAC1                              | TIMM13    |
|                                | VDAC2                              | TIMM17A   |
|                                | VDAC3                              | TIMM45    |
|                                |                                    | TIMM8B    |
|                                |                                    | TOMM70    |
|                                |                                    | UQCRL10   |
|                                |                                    | UQCRL11   |
|                                |                                    | UQCRC1    |
|                                |                                    | UQCRC2    |
|                                |                                    | UQCRCF1   |
|                                |                                    | VDAC1     |
|                                |                                    | VDAC2     |
|                                |                                    | VDAC3     |

# SUPPLEMENTARY FIGURE 1

**A**

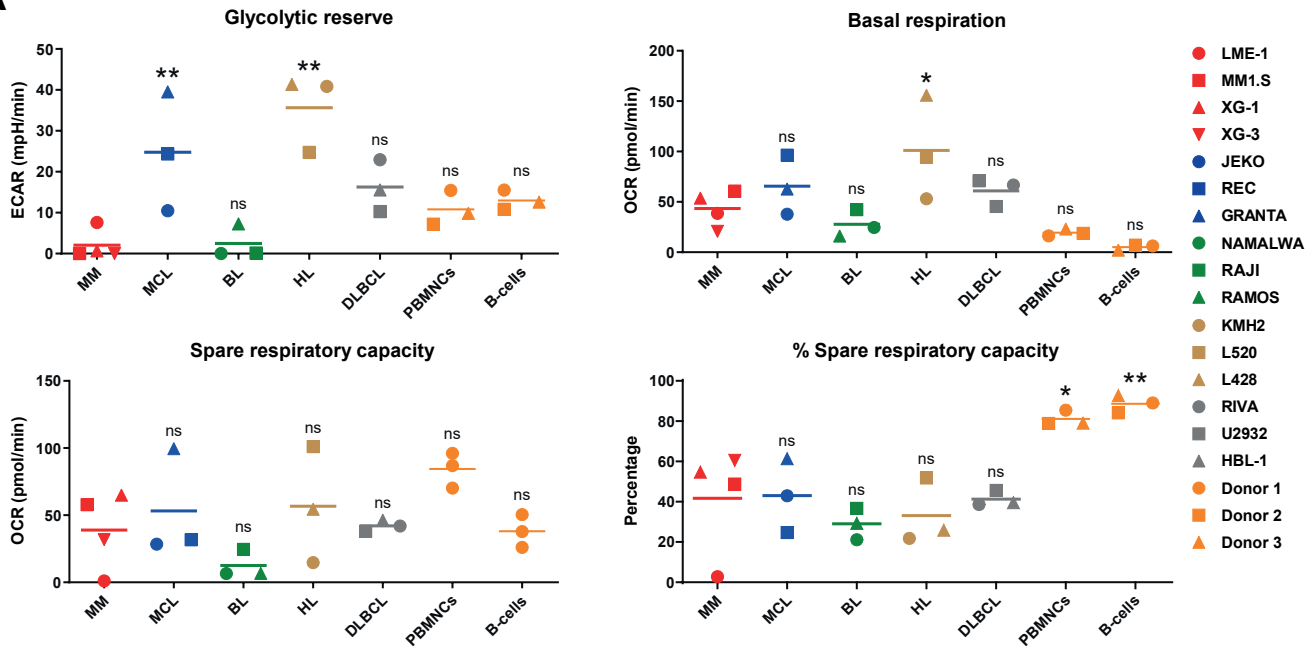

**B**

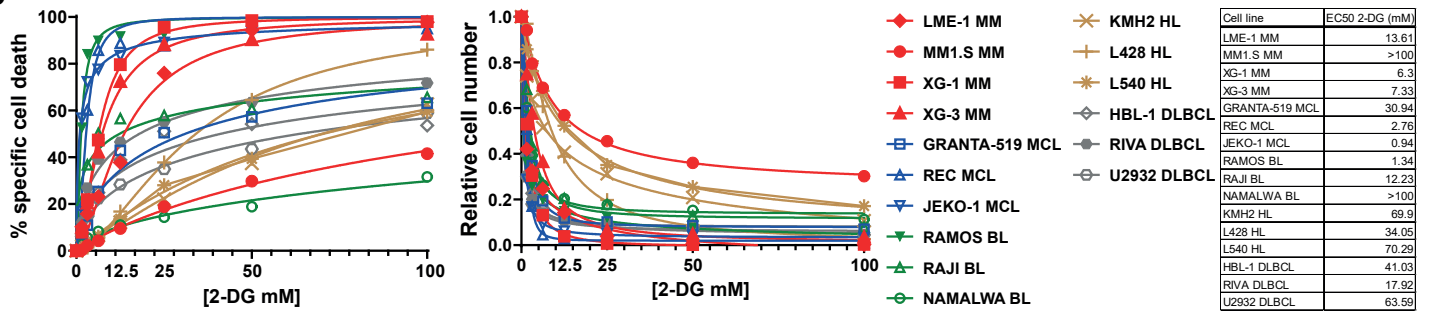

**C**

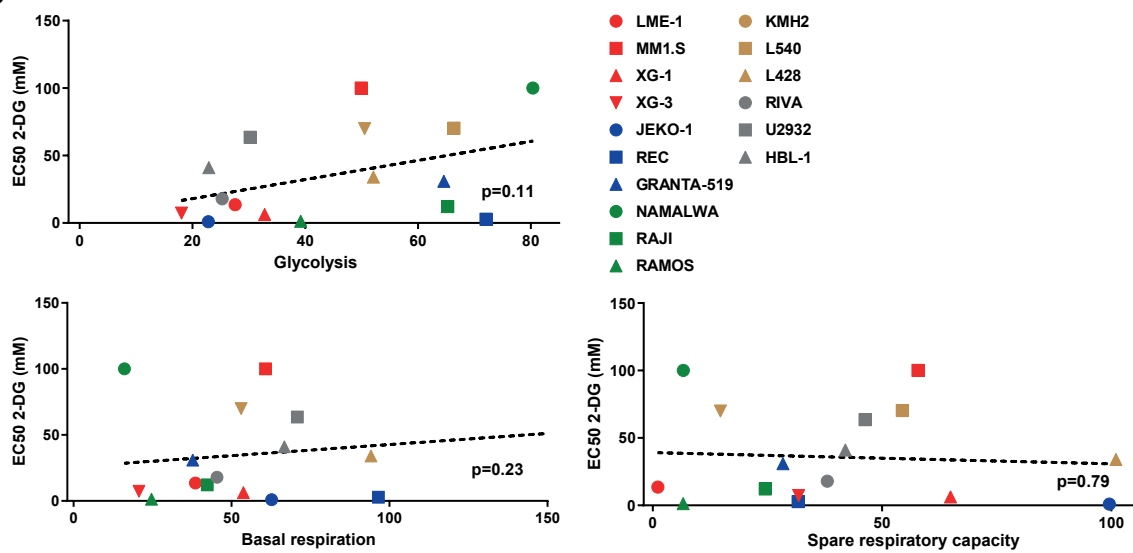

**D**

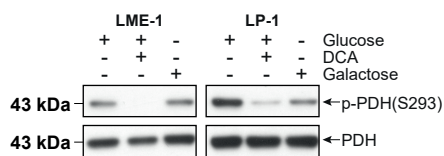

**E**

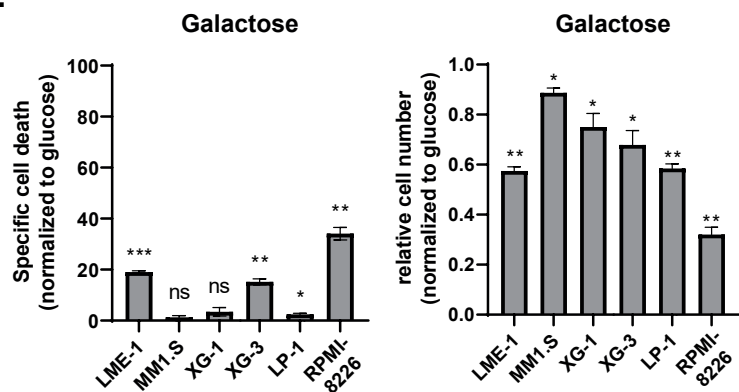

**SUPPLEMENTARY FIGURE 1. 2-deoxy-D-glucose (2-DG) and galactose treatment reduces viability but does not correlate with metabolic function in HMCLs**

**(A)** Seahorse FX real-time metabolic profiling of HMCLs (red symbols), BCLs (blue, green, brown and grey symbols), activated PBMNCs and purified B cells (orange symbols). Mean values for Glycolytic reserve, based on extracellular acidification rates (ECAR), and mean values for basal respiration, spare respiratory capacity and % spare respiratory capacity based on oxygen consumption rates (OCR) are depicted (one-way ANOVA with Bonferroni's multiple comparisons test; HMCLs versus BCLs, \* $p < 0.05$ , \*\* $p < 0.01$ , ns = not significant,  $n = 5$  measurements for the HMCLs and BCLs,  $n = 3$  donors for PBMNCs and B-cells). **(B)** Percent specific cell death (left panel) and relative cell numbers (middle panel) of HMCLs (red symbols and lines) and BCLs (blue, green, brown and grey symbols and lines) treated with increasing concentrations of 2-DG (1.56, 3.12, 6.25, 12.5, 25, 50 and 100 mM) for 3 days. Corresponding EC50 values (cell death) are depicted in the table (right panel). Mean values of 3 independent experiments are shown. **(C)** Linear regression analysis of the mean glycolysis, basal respiration, and spare respiratory capacity values (y-axis) versus the EC50 specific cell death values for 2-DG (x-axis) in HMCLs (red symbols) and BCLs (blue, green, brown and grey symbols). **(D)** Immunoblot analysis of total and phosphorylated (Ser293) pyruvate dehydrogenase (PDH), in the HMCLs LME-1 and LP-1 incubated with 25 mM DCA for 20 hours, cultured in galactose-containing glucose-free medium for 20 hours, or left untreated. **(E)** Percent specific cell death of HMCLs incubated with galactose or glucose for 4 days (left panel, normalized to the glucose condition) and relative cell numbers, (right panel, normalized to the glucose condition). Mean values  $\pm$  SEM of 3 independent experiments are shown, (one-sample t-test, \* $p < 0.05$ , \*\* $p < 0.01$ ).

# SUPPLEMENTARY FIGURE 2

**A**

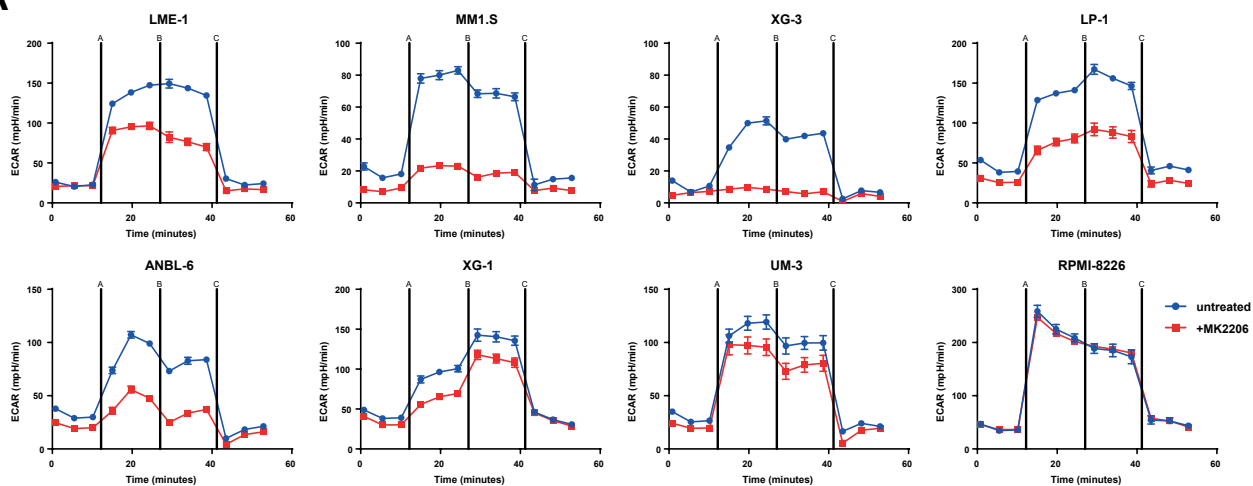

**B**

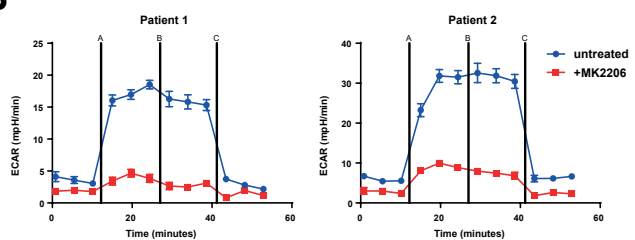

**C**

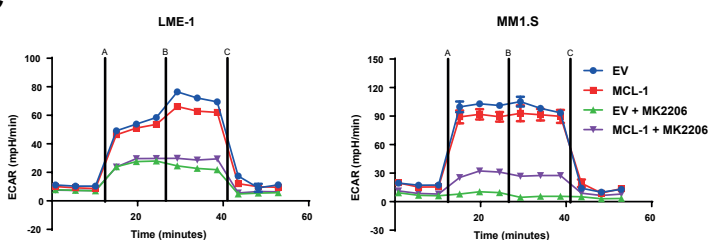

**D**

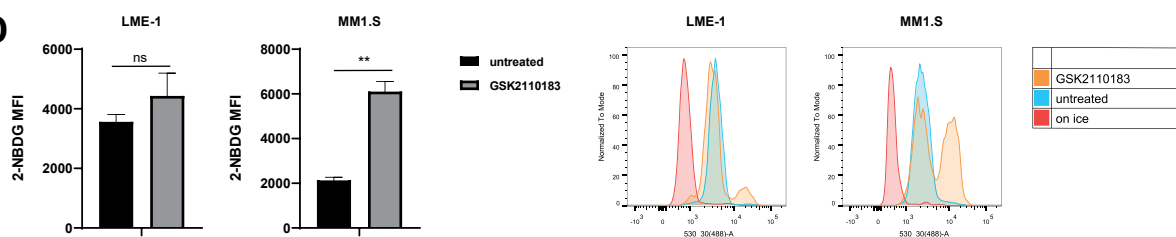

**E**

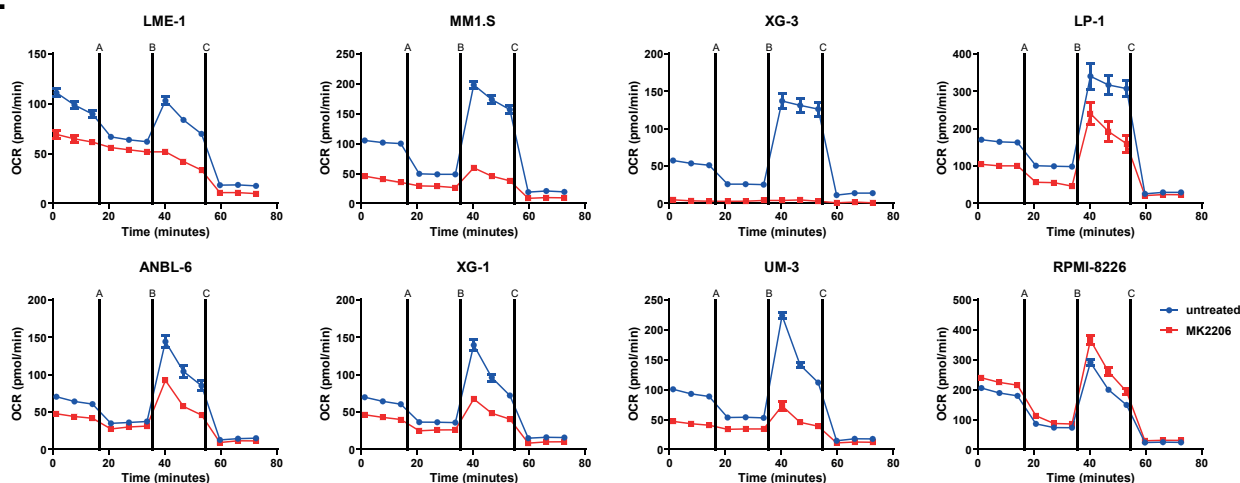

**F**

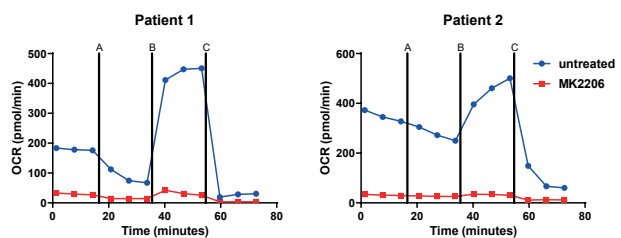

**G**

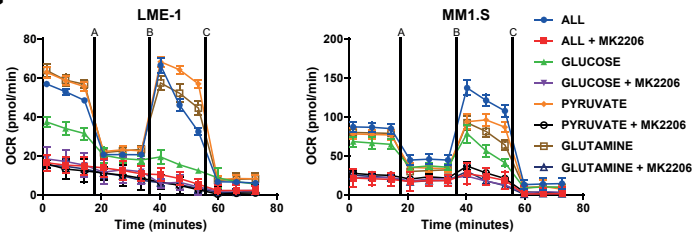

**H**

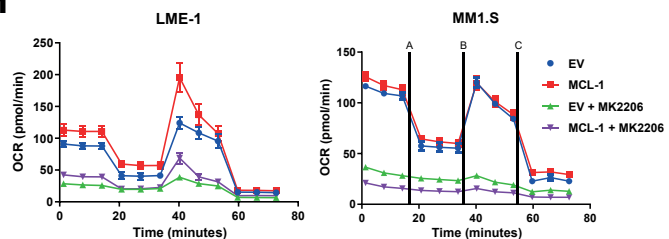



## **SUPPLEMENTARY FIGURE 2. AKT sustains glycolysis and OXPHOS in MM cells**

Seahorse XF glycolysis stress test profiles of HMCLs **(A)** and primary plasma cells from MM patients (n=2) **(B)** incubated with 2.5  $\mu$ M MK2206 (AKT inhibitor) for 20 hours (red symbols and lines) or left untreated (blue symbols and lines). Means  $\pm$  SEM (n=5-6 measurements) of the extracellular acidification rate (ECAR) values are shown, Seahorse XF glycolysis stress test injections are indicated (A=glucose, B=oligomycin, C=2-DG). **(C)** Seahorse XF glycolysis stress test profiles of HMCLs overexpressing MCL-1 (red and purple symbols and lines) or empty vector (EV) (blue and green symbols and lines) indicate that MCL-1 does not rescue AKT inhibitor-induced decrease in ECAR. HMCLs were treated with 2.5  $\mu$ M MK2206 for 20 hours or left untreated, means  $\pm$  SEM of the ECAR values are depicted. **(D)** Glucose analog (2-NBDG) uptake assay in LME-1 and MM1.S cells incubated with 2.5  $\mu$ M GSK2110183 (AKT inhibitor) for 20 hours (grey bars), or left untreated (black bars). Bar graph depicts mean fluorescent intensity (MFI) (t-test, \*p<0.05, \*\*p<0.01, n=3) (left panel), representative flow cytometry histograms are shown (right panel). Seahorse XF mitochondrial stress test profiles of HMCLs **(E)** and primary plasma cells from MM patients (n=2) **(F)** treated with 2.5  $\mu$ M MK2206 for 20 hours (red symbols and lines) or left untreated (blue symbols and lines). Means  $\pm$  SEM of the oxygen consumption rate (OCR) values are depicted, Seahorse XF mitochondrial stress test injections are indicated (A=oligomycin, B=FCCP, C=rotenone & antimycin A). **(G)** Seahorse XF mitochondrial stress test profiles of LME-1 (left panel) and MM1.S (right panel) using glucose, pyruvate or glutamine as sole carbon sources, or in the presence of the combination of glucose, pyruvate and glutamine (green, yellow, brown and blue symbols and lines, respectively). Cells were treated with 2.5  $\mu$ M MK2206 for 20 hours (red, purple, black and dark blue symbols and lines). Carbon sources were injected at time point t=0. Means  $\pm$  SEM of the OCR values (n=5-6 measurements) are depicted. **(H)** Seahorse XF mitochondrial stress test profiles of HMCLs overexpressing MCL-1 (red and purple symbols and lines) or empty vector (EV) control cell lines (blue and green symbols and lines). MCL-1 does not restore the AKT inhibitor-induced decrease in OCR. HMCLs were incubated with 2.5  $\mu$ M MK2206 for 20 hours, or left untreated. Means  $\pm$  SEM (n=5-6 measurement) of the OCR values are depicted.

# SUPPLEMENTARY FIGURE 3

**A**

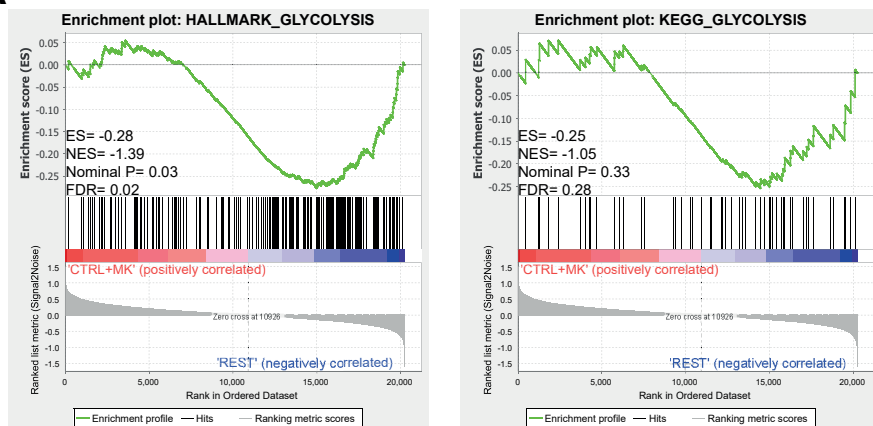

**B**

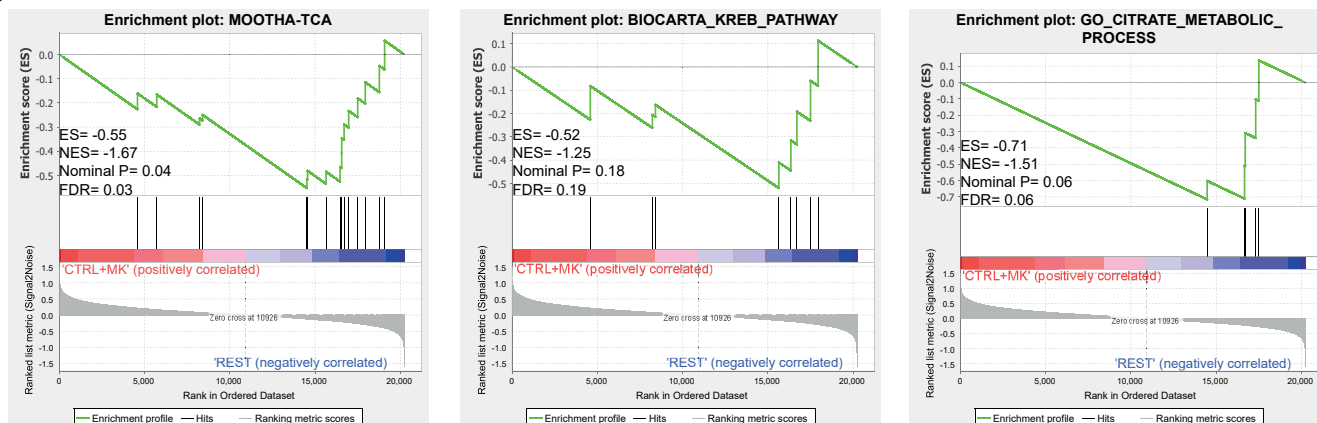

**C**

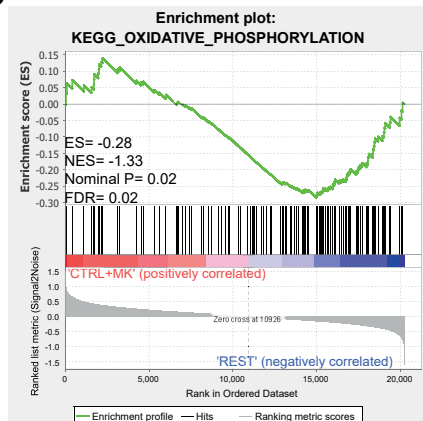

**D**

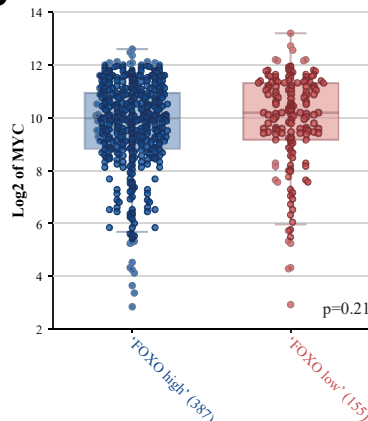

## SUPPLEMENTARY FIGURE 3. FOXO represses the expression of genes involved in glycolysis, the TCA-cycle and OXPHOS

**(A-C)** Gene set enrichment analysis (GSEA) of Cas9-control (CTRL) HMCL clones treated overnight with 2.5  $\mu$ M MK2206 ('CTRL+MK') versus the combination of untreated CTRL clones and FOXO knockout clones, either treated overnight with 2.5  $\mu$ M MK2206 or left untreated ('REST'). Datasets from the HMCLs LME1, MM1.S and XG-3 were combined for GSEA. Enrichment plots for HALLMARK\_GLYCOLYSIS, KEGG\_GLYCOLYSIS, MOOTHA\_TCA, BIOCARTA\_KREBB\_PATHWAY, GO-CITRATE\_METABOLIC\_PROCESS and KEGG\_OXIDATIVE\_PHOSPHORYLATION gene sets are shown. FDR, ES, NES and p-values are shown in the plots. **(D)** MM patient groups defined by k-means clustering were labeled as 'FOXO high' (n=387) and 'FOXO low' (n=155). Depicted are the normalized Log2 transformed microarray gene expression levels of MYC as boxplots for the 'FOXO high' and 'FOXO low' patient groups (each circle represents the mRNA levels of a different patient, p=0.21, ANNOVA)

# SUPPLEMENTARY FIGURE 4

**A**

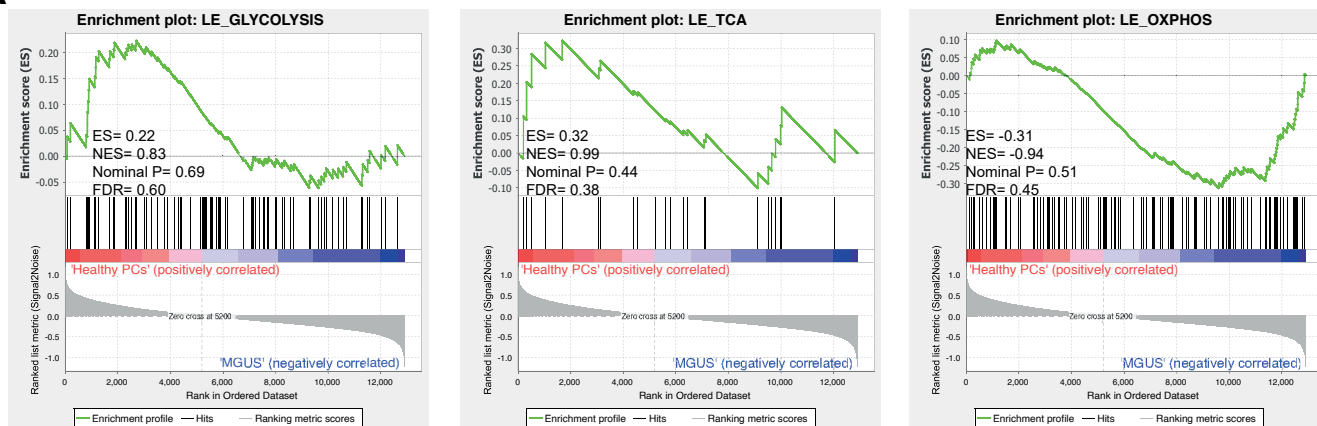

**B**

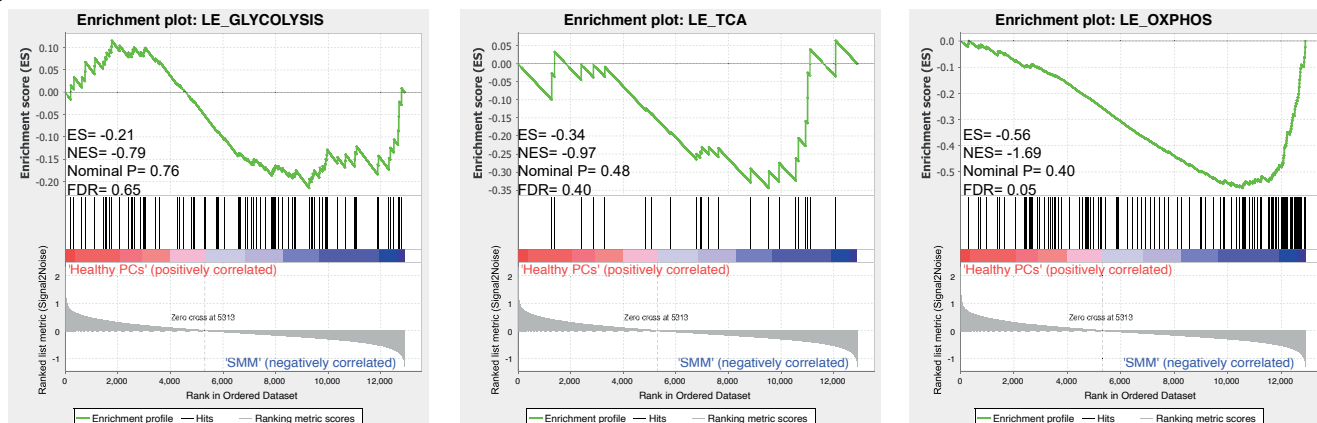

**C**

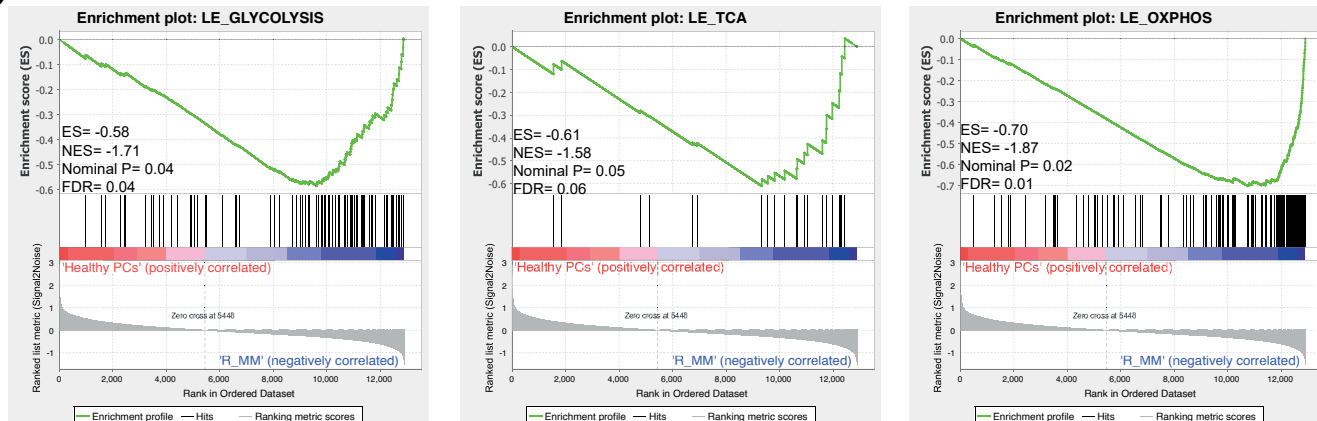

## SUPPLEMENTARY FIGURE 4. FOXO repressed metabolic genes are upregulated in MM disease progression.

(A-C) GSEA enrichments plots show enrichment of the FOXO-regulated LE\_GLYCOLYSIS, LE\_TCA\_CYCLE and LE\_OXPPOS gene sets (see table S1) in plasma cells from MGUS patients (MGUS, n=21), smouldering MM patients (SMM, n=23) or relapsed MM patients (R\_MM, n=27) compared to plasma cells from healthy donors (Healthy PCs, n=15). FDR, ES, NES and p-value, are depicted in the plots.
